# Supplementary material for: Valorization and Mechanical Recycling of Heterogeneous Post-Consumer Polymer Waste through a Mechano-Chemical Process
Source: MDPI journal article supplement (doi:10.3390/polym13162783), 2021-08-19
Supplement: s1 [file s1]

## Supplementary material

# Valorization and mechanical recycling of heterogeneous post-consumer polymer waste through a mechano-chemical process

Roberta Capuano<sup>1,2,†</sup>, Irene Bonadies<sup>1,†</sup>, Rachele Castaldo<sup>1</sup>, Mariacristina Cocca<sup>1</sup>, Gennaro Gentile<sup>1</sup>, Antonio Protopapa<sup>3</sup>, Roberto Avolio<sup>1,\*</sup>, Maria Emanuela Errico<sup>1</sup>

<sup>1</sup> Institute for Polymers, Composites and Biomaterials-IPCB, National Research Council (CNR), Via Campi Flegrei, 34 - 80078 Pozzuoli (Na), Italy; roberta.capuano@ipcb.cnr.it (R.C1.); irene.bonadies@ipcb.cnr.it (I.B.); rachele.castaldo@ipcb.cnr.it (R.C2.); mariacristina.cocca@ipcb.cnr.it (M.C.); gennaro.gentile@ipcb.cnr.it (G.G.); mariaemanuela.errico@ipcb.cnr.it (M.E.E.)

<sup>2</sup> Department of Mechanical and Industrial Engineering - DIMI, University of Brescia, via Branze, 38 - 25121 Brescia, Italy

<sup>3</sup> Italian Consortium for the Collection and Recycling of Plastic Packages - COREPLA, Via del Vecchio Politecnico, 3 - 20121 Milano, Italy; protopapa@corepla.it (A.P.)

\* Correspondence: roberto.avolio@ipcb.cnr.it (R.A.)

† These authors contributed equally to this work

### 1. Image analysis

Image analysis was carried out on SEM micrographs of cryo-fractured surfaces, to obtain quantitative geometrical information on the dispersed phase.

The ImageJ software package was used for the analysis. Contrast and brightness of the micrographs were adjusted to evidence any discontinuity in the surface, then the dispersed phase was identified and inclusions were manually fitted to ellipses. For neat FIL/S, the area of the micrograph containing large (> 5  $\mu\text{m}$ ) inclusions of irregular shape was excluded from the analysis.

In Figures S1 and S2, the analyzed areas and the results of dispersed phase identification are shown, respectively.

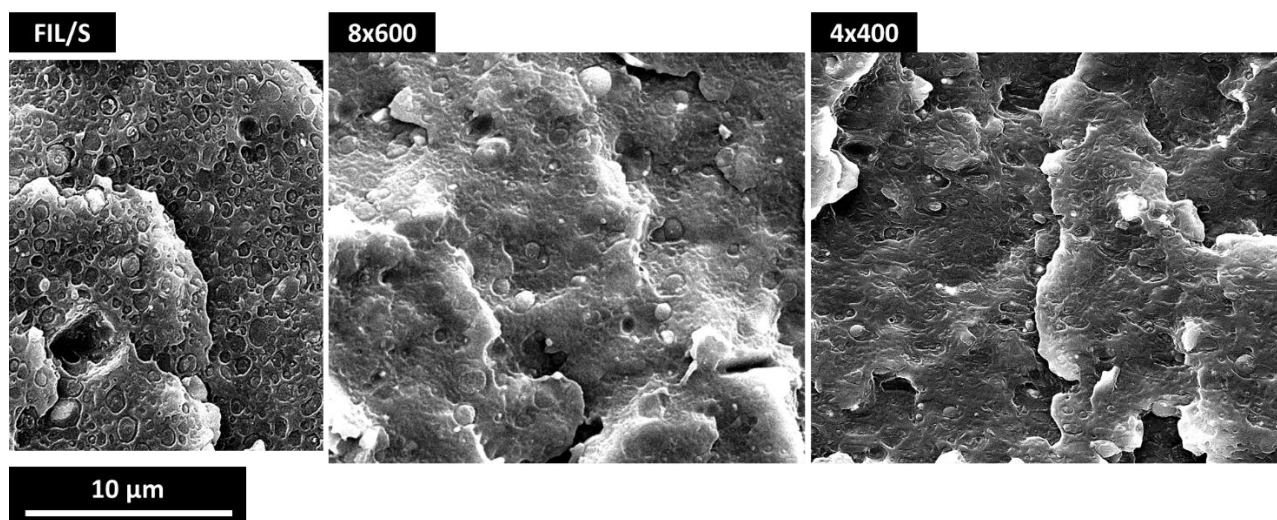

Figure S1. Areas selected for image analysis with contrast enhancement

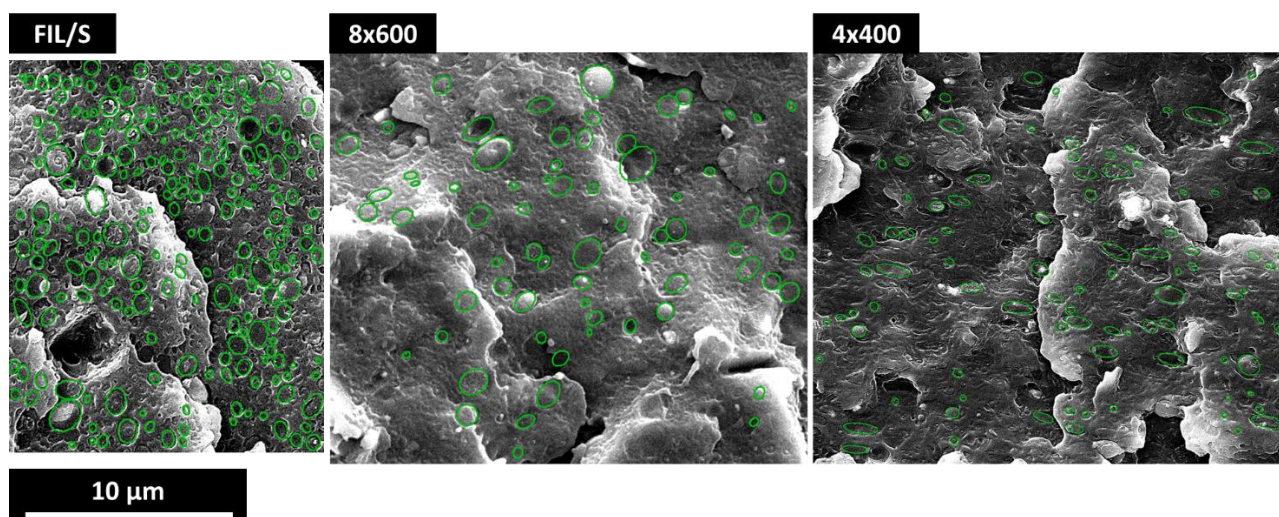

**Figure S2.** Dispersed phase inclusions identified and fitted to ellipses

Geometrical parameters of the identified inclusions are reported in Tables S1, S2 and S3 for FIL/S, 8x600 and 4x400 samples, respectively. Circularity is calculated as  $4\pi(\text{area}/\text{perimeter}^2)$ .

**Table S1.** Parameters calculated from image analysis on FIL/S

| n  | Area  | Major | Minor | Angle | Circularity |
|----|-------|-------|-------|-------|-------------|
| 1  | 0.056 | 0.316 | 0.226 | 90    | 0.932       |
| 2  | 0.197 | 0.575 | 0.436 | 90    | 0.952       |
| 3  | 0.229 | 0.653 | 0.447 | 90    | 0.954       |
| 4  | 0.253 | 0.617 | 0.522 | 90    | 1           |
| 5  | 0.181 | 0.514 | 0.449 | 90    | 1           |
| 6  | 0.581 | 0.884 | 0.836 | 90    | 1           |
| 7  | 0.153 | 0.486 | 0.402 | 90    | 1           |
| 8  | 0.39  | 0.705 | 0.705 | 0     | 1           |
| 9  | 0.208 | 0.514 | 0.514 | 0     | 1           |
| 10 | 0.072 | 0.395 | 0.232 | 90    | 0.912       |
| 11 | 0.33  | 0.721 | 0.583 | 90    | 0.969       |
| 12 | 0.288 | 0.634 | 0.578 | 90    | 1           |
| 13 | 0.34  | 0.689 | 0.627 | 0     | 1           |
| 14 | 0.186 | 0.55  | 0.432 | 90    | 0.972       |
| 15 | 0.414 | 0.849 | 0.621 | 90    | 0.979       |
| 16 | 0.119 | 0.465 | 0.324 | 0     | 0.921       |
| 17 | 0.181 | 0.577 | 0.4   | 90    | 0.934       |
| 18 | 0.304 | 0.663 | 0.584 | 90    | 1           |
| 19 | 0.886 | 1.062 | 1.062 | 0     | 1           |
| 20 | 0.645 | 1.022 | 0.803 | 90    | 0.979       |
| 21 | 1.435 | 1.425 | 1.281 | 90    | 1           |
| 22 | 0.218 | 0.586 | 0.475 | 0     | 0.988       |
| 23 | 0.068 | 0.328 | 0.264 | 0     | 1           |
| 24 | 0.085 | 0.376 | 0.289 | 90    | 1           |
| 25 | 0.068 | 0.328 | 0.264 | 90    | 1           |

|    |       |       |       |         |       |
|----|-------|-------|-------|---------|-------|
| 26 | 0.374 | 0.768 | 0.62  | 90      | 0.986 |
| 27 | 0.474 | 0.87  | 0.694 | 90      | 0.974 |
| 28 | 0.967 | 1.13  | 1.089 | 90      | 0.994 |
| 29 | 0.414 | 0.849 | 0.621 | 90      | 0.979 |
| 30 | 0.769 | 1.067 | 0.917 | 90      | 1     |
| 31 | 0.434 | 0.843 | 0.656 | 90      | 0.98  |
| 32 | 0.069 | 0.297 | 0.297 | 0       | 1     |
| 33 | 0.069 | 0.297 | 0.297 | 0       | 1     |
| 34 | 0.314 | 0.723 | 0.553 | 90      | 0.971 |
| 35 | 0.181 | 0.577 | 0.4   | 90      | 0.934 |
| 36 | 0.301 | 0.802 | 0.478 | 90      | 0.909 |
| 37 | 0.507 | 0.961 | 0.672 | 55.104  | 0.96  |
| 38 | 0.341 | 0.847 | 0.513 | 121.582 | 0.906 |
| 39 | 0.304 | 0.791 | 0.489 | 120.69  | 0.911 |
| 40 | 0.574 | 1.106 | 0.661 | 96.313  | 0.91  |
| 41 | 0.413 | 0.78  | 0.674 | 103.423 | 0.982 |
| 42 | 0.37  | 0.778 | 0.606 | 82.876  | 0.976 |
| 43 | 0.117 | 0.438 | 0.341 | 122.882 | 0.987 |
| 44 | 0.226 | 0.6   | 0.481 | 100.618 | 0.99  |
| 45 | 0.127 | 0.555 | 0.29  | 78.175  | 0.85  |
| 46 | 0.787 | 1.156 | 0.867 | 88.179  | 0.961 |
| 47 | 0.282 | 0.679 | 0.53  | 130.196 | 0.99  |
| 48 | 0.103 | 0.403 | 0.324 | 137.912 | 0.951 |
| 49 | 0.148 | 0.483 | 0.39  | 92.85   | 0.966 |
| 50 | 0.763 | 0.986 | 0.986 | 0       | 1     |
| 51 | 0.442 | 0.844 | 0.667 | 92.375  | 0.981 |
| 52 | 0.232 | 0.602 | 0.49  | 132.701 | 0.985 |
| 53 | 0.053 | 0.293 | 0.232 | 90      | 0.977 |
| 54 | 0.162 | 0.492 | 0.421 | 114.612 | 1     |
| 55 | 0.1   | 0.378 | 0.337 | 107.89  | 0.969 |
| 56 | 0.278 | 0.633 | 0.56  | 90      | 0.99  |
| 57 | 0.252 | 0.613 | 0.523 | 88.175  | 0.999 |
| 58 | 0.196 | 0.533 | 0.468 | 125.013 | 1     |
| 59 | 0.162 | 0.491 | 0.421 | 120.474 | 1     |
| 60 | 0.201 | 0.546 | 0.469 | 116.996 | 0.976 |
| 61 | 0.18  | 0.619 | 0.37  | 42.765  | 0.91  |
| 62 | 0.218 | 0.619 | 0.449 | 100.418 | 0.968 |
| 63 | 0.281 | 0.632 | 0.566 | 90      | 0.984 |
| 64 | 0.288 | 0.71  | 0.516 | 86.518  | 0.952 |
| 65 | 0.209 | 0.604 | 0.441 | 94.817  | 0.964 |
| 66 | 0.095 | 0.348 | 0.346 | 45      | 0.978 |
| 67 | 0.217 | 0.581 | 0.476 | 77.776  | 0.996 |
| 68 | 0.196 | 0.552 | 0.451 | 90      | 1     |
| 69 | 0.124 | 0.438 | 0.36  | 135     | 0.993 |
| 70 | 0.047 | 0.283 | 0.21  | 59.093  | 0.885 |
| 71 | 0.292 | 0.672 | 0.553 | 69.054  | 0.987 |

|     |       |       |       |         |       |
|-----|-------|-------|-------|---------|-------|
| 72  | 0.213 | 0.655 | 0.414 | 98.749  | 0.92  |
| 73  | 0.085 | 0.402 | 0.27  | 116.138 | 0.928 |
| 74  | 0.117 | 0.474 | 0.315 | 138.18  | 0.926 |
| 75  | 0.104 | 0.445 | 0.297 | 82.58   | 0.955 |
| 76  | 0.103 | 0.442 | 0.295 | 136.473 | 0.911 |
| 77  | 0.174 | 0.574 | 0.387 | 132.295 | 0.934 |
| 78  | 0.144 | 0.522 | 0.351 | 133.99  | 0.931 |
| 79  | 0.055 | 0.32  | 0.217 | 121.148 | 0.972 |
| 80  | 0.137 | 0.52  | 0.336 | 121.186 | 0.967 |
| 81  | 0.048 | 0.309 | 0.197 | 138.144 | 0.985 |
| 82  | 0.08  | 0.387 | 0.263 | 126.77  | 0.93  |
| 83  | 0.079 | 0.377 | 0.265 | 126.141 | 0.946 |
| 84  | 0.043 | 0.285 | 0.19  | 135     | 0.959 |
| 85  | 0.075 | 0.382 | 0.248 | 111.599 | 0.875 |
| 86  | 0.31  | 0.656 | 0.602 | 131.324 | 0.986 |
| 87  | 0.286 | 0.75  | 0.486 | 84.923  | 0.926 |
| 88  | 0.493 | 1.044 | 0.601 | 105.487 | 0.899 |
| 89  | 0.087 | 0.432 | 0.255 | 130.098 | 0.885 |
| 90  | 0.131 | 0.414 | 0.402 | 134.984 | 0.972 |
| 91  | 0.063 | 0.393 | 0.203 | 59.98   | 0.873 |
| 92  | 0.089 | 0.443 | 0.257 | 83.866  | 0.899 |
| 93  | 0.166 | 0.594 | 0.357 | 58.955  | 0.914 |
| 94  | 0.089 | 0.446 | 0.255 | 56.932  | 0.924 |
| 95  | 0.099 | 0.467 | 0.269 | 64.455  | 0.923 |
| 96  | 1.067 | 1.432 | 0.948 | 116.563 | 0.944 |
| 97  | 0.429 | 0.79  | 0.691 | 102.636 | 0.991 |
| 98  | 0.165 | 0.604 | 0.348 | 86.83   | 0.876 |
| 99  | 0.067 | 0.38  | 0.223 | 113.461 | 0.892 |
| 100 | 0.079 | 0.377 | 0.265 | 97.644  | 0.931 |
| 101 | 0.252 | 0.683 | 0.469 | 99.057  | 0.952 |
| 102 | 0.718 | 1.144 | 0.799 | 94.238  | 0.95  |
| 103 | 0.882 | 1.269 | 0.885 | 90      | 0.949 |
| 104 | 0.286 | 0.714 | 0.51  | 90.303  | 0.943 |
| 105 | 0.077 | 0.386 | 0.255 | 107.338 | 0.959 |
| 106 | 0.08  | 0.383 | 0.265 | 96.055  | 0.927 |
| 107 | 0.057 | 0.356 | 0.205 | 119.82  | 0.911 |
| 108 | 0.161 | 0.5   | 0.411 | 82.969  | 0.962 |
| 109 | 0.586 | 0.97  | 0.769 | 139.285 | 0.982 |
| 110 | 0.205 | 0.581 | 0.45  | 80.212  | 0.985 |
| 111 | 0.376 | 0.781 | 0.613 | 70.667  | 0.974 |
| 112 | 0.056 | 0.299 | 0.238 | 123.951 | 0.999 |
| 113 | 0.165 | 0.52  | 0.405 | 105.185 | 0.986 |
| 114 | 0.097 | 0.397 | 0.312 | 120.878 | 0.955 |
| 115 | 0.105 | 0.406 | 0.33  | 96.987  | 0.996 |
| 116 | 0.06  | 0.318 | 0.24  | 48.392  | 0.978 |
| 117 | 0.189 | 0.57  | 0.422 | 99.209  | 0.965 |

|     |       |       |       |         |       |
|-----|-------|-------|-------|---------|-------|
| 118 | 0.048 | 0.279 | 0.219 | 136.651 | 0.989 |
| 119 | 0.036 | 0.249 | 0.184 | 76.952  | 0.978 |
| 120 | 0.781 | 1.242 | 0.8   | 57.327  | 0.936 |
| 121 | 0.234 | 0.682 | 0.437 | 101.923 | 0.954 |
| 122 | 0.22  | 0.661 | 0.423 | 121.23  | 0.947 |
| 123 | 0.635 | 1.04  | 0.778 | 52.726  | 0.972 |
| 124 | 0.242 | 0.634 | 0.487 | 75.549  | 0.988 |
| 125 | 0.482 | 0.906 | 0.677 | 48.813  | 0.971 |
| 126 | 0.262 | 0.631 | 0.529 | 97.343  | 0.991 |
| 127 | 0.382 | 0.754 | 0.645 | 67.464  | 0.993 |
| 128 | 0.081 | 0.358 | 0.289 | 110.221 | 1     |
| 129 | 0.254 | 0.661 | 0.49  | 106.713 | 0.973 |
| 130 | 0.237 | 0.641 | 0.471 | 122.566 | 0.953 |
| 131 | 0.892 | 1.252 | 0.907 | 77.557  | 0.96  |
| 132 | 0.928 | 1.291 | 0.916 | 98.447  | 0.958 |
| 133 | 0.477 | 0.845 | 0.718 | 82.504  | 0.993 |
| 134 | 0.348 | 0.861 | 0.514 | 45.002  | 0.883 |
| 135 | 0.213 | 0.678 | 0.4   | 39.782  | 0.92  |
| 136 | 0.284 | 0.78  | 0.463 | 54.161  | 0.901 |
| 137 | 0.381 | 0.908 | 0.534 | 138.407 | 0.907 |
| 138 | 0.06  | 0.358 | 0.213 | 132.141 | 0.894 |
| 139 | 0.041 | 0.299 | 0.176 | 63.569  | 0.885 |
| 140 | 0.087 | 0.427 | 0.258 | 40.845  | 0.877 |
| 141 | 0.178 | 0.622 | 0.365 | 128.076 | 0.896 |
| 142 | 0.077 | 0.407 | 0.242 | 110.17  | 0.899 |
| 143 | 0.599 | 0.976 | 0.782 | 98.985  | 0.985 |
| 144 | 0.246 | 0.638 | 0.492 | 21.199  | 0.966 |
| 145 | 0.184 | 0.557 | 0.42  | 125.107 | 0.972 |
| 146 | 0.121 | 0.408 | 0.378 | 172.407 | 0.991 |
| 147 | 0.324 | 0.707 | 0.583 | 71.623  | 0.978 |
| 148 | 0.084 | 0.336 | 0.318 | 121.409 | 1     |
| 149 | 0.245 | 0.562 | 0.556 | 136.866 | 1     |
| 150 | 0.868 | 1.208 | 0.916 | 63.231  | 0.967 |
| 151 | 0.168 | 0.535 | 0.399 | 97.09   | 0.977 |
| 152 | 0.481 | 0.905 | 0.677 | 83.244  | 0.971 |
| 153 | 0.381 | 0.869 | 0.558 | 55.146  | 0.921 |
| 154 | 0.306 | 0.786 | 0.496 | 112.465 | 0.92  |
| 155 | 0.293 | 0.75  | 0.497 | 96.967  | 0.917 |
| 156 | 0.2   | 0.628 | 0.405 | 70.025  | 0.92  |
| 157 | 1.73  | 1.693 | 1.301 | 43.955  | 0.975 |
| 158 | 0.916 | 1.278 | 0.913 | 80.217  | 0.963 |
| 159 | 0.923 | 1.317 | 0.893 | 4.677   | 0.938 |
| 160 | 0.3   | 0.752 | 0.507 | 58.615  | 0.954 |
| 161 | 0.159 | 0.496 | 0.407 | 100.299 | 0.986 |
| 162 | 0.12  | 0.435 | 0.351 | 40.392  | 0.997 |
| 163 | 0.108 | 0.413 | 0.332 | 72.059  | 1     |

|     |       |       |       |         |       |
|-----|-------|-------|-------|---------|-------|
| 164 | 0.075 | 0.33  | 0.288 | 134.998 | 0.971 |
| 165 | 0.091 | 0.381 | 0.302 | 103.252 | 0.988 |
| 166 | 0.093 | 0.387 | 0.307 | 97.018  | 0.991 |
| 167 | 0.065 | 0.323 | 0.258 | 109.375 | 1     |
| 168 | 0.069 | 0.414 | 0.213 | 118.2   | 0.838 |
| 169 | 0.987 | 1.173 | 1.071 | 139.214 | 0.994 |
| 170 | 0.116 | 0.448 | 0.329 | 84.871  | 0.963 |
| 171 | 0.043 | 0.274 | 0.198 | 120.305 | 1     |
| 172 | 0.037 | 0.259 | 0.184 | 130.667 | 0.866 |
| 173 | 0.039 | 0.258 | 0.191 | 135     | 0.913 |
| 174 | 0.096 | 0.427 | 0.286 | 111.982 | 0.926 |
| 175 | 0.176 | 0.554 | 0.404 | 132.448 | 0.947 |
| 176 | 0.107 | 0.451 | 0.301 | 113.818 | 0.953 |
| 177 | 0.365 | 0.815 | 0.57  | 98.873  | 0.961 |
| 178 | 0.127 | 0.478 | 0.337 | 119.76  | 0.947 |
| 179 | 0.049 | 0.291 | 0.216 | 112.224 | 0.987 |
| 180 | 0.099 | 0.428 | 0.293 | 70.199  | 0.94  |
| 181 | 0.189 | 0.577 | 0.417 | 129.274 | 0.932 |
| 182 | 0.178 | 0.575 | 0.395 | 120.317 | 0.947 |
| 183 | 0.06  | 0.326 | 0.234 | 137.765 | 1     |
| 184 | 0.389 | 0.84  | 0.589 | 84.187  | 0.949 |
| 185 | 0.041 | 0.261 | 0.201 | 121.037 | 0.99  |
| 186 | 0.093 | 0.402 | 0.296 | 76.43   | 0.937 |
| 187 | 0.028 | 0.222 | 0.16  | 118.619 | 1     |
| 188 | 0.208 | 0.687 | 0.385 | 152.483 | 0.877 |
| 189 | 0.159 | 0.495 | 0.407 | 125.049 | 1     |
| 190 | 0.047 | 0.283 | 0.21  | 120.907 | 0.906 |
| 191 | 0.031 | 0.24  | 0.163 | 33.306  | 0.977 |
| 192 | 0.076 | 0.366 | 0.264 | 128.069 | 0.975 |
| 193 | 0.075 | 0.357 | 0.266 | 129.076 | 0.958 |
| 194 | 0.16  | 0.524 | 0.389 | 55.303  | 0.969 |
| 195 | 0.221 | 0.618 | 0.455 | 64.257  | 0.965 |
| 196 | 0.107 | 0.442 | 0.307 | 68.313  | 0.955 |
| 197 | 0.412 | 0.879 | 0.596 | 111.796 | 0.941 |
| 198 | 0.089 | 0.345 | 0.329 | 45.007  | 0.995 |
| 199 | 0.822 | 1.024 | 1.022 | 78.309  | 0.997 |
| 200 | 0.489 | 0.789 | 0.789 | 47.749  | 0.991 |
| 201 | 0.105 | 0.368 | 0.364 | 135     | 1     |
| 202 | 0.125 | 0.417 | 0.383 | 90      | 1     |
| 203 | 0.029 | 0.203 | 0.184 | 134.999 | 0.974 |
| 204 | 0.145 | 0.491 | 0.377 | 70.326  | 0.95  |
| 205 | 0.141 | 0.492 | 0.365 | 127.37  | 0.948 |
| 206 | 0.067 | 0.335 | 0.253 | 93.648  | 0.965 |
| 207 | 0.052 | 0.312 | 0.212 | 114.675 | 0.944 |
| 208 | 0.155 | 0.526 | 0.374 | 109.688 | 0.95  |
| 209 | 0.067 | 0.346 | 0.245 | 113.981 | 0.927 |

|     |       |       |       |         |       |
|-----|-------|-------|-------|---------|-------|
| 210 | 0.043 | 0.233 | 0.233 | 0       | 1     |
| 211 | 0.068 | 0.301 | 0.288 | 119.488 | 0.981 |
| 212 | 0.101 | 0.371 | 0.347 | 90      | 0.996 |
| 213 | 0.053 | 0.266 | 0.255 | 54.277  | 1     |
| 214 | 0.112 | 0.43  | 0.331 | 126.089 | 0.979 |
| 215 | 0.067 | 0.32  | 0.265 | 49.429  | 1     |
| 216 | 0.099 | 0.44  | 0.285 | 50.16   | 0.935 |
| 217 | 0.663 | 1.387 | 0.609 | 116.759 | 0.787 |
| 218 | 0.305 | 0.752 | 0.517 | 98.041  | 0.943 |
| 219 | 0.045 | 0.294 | 0.196 | 24.246  | 0.974 |

**Table S2.** Parameters calculated from image analysis on 8x600

| <b>n</b> | <b>Area</b> | <b>Major</b> | <b>Minor</b> | <b>Angle</b> | <b>Circularity</b> |
|----------|-------------|--------------|--------------|--------------|--------------------|
| 1        | 0.592       | 1.041        | 0.724        | 36.218       | 0.955              |
| 2        | 0.435       | 1.069        | 0.518        | 17.828       | 0.813              |
| 3        | 0.562       | 0.932        | 0.768        | 45.774       | 0.985              |
| 4        | 0.577       | 0.947        | 0.776        | 37.157       | 0.992              |
| 5        | 1.945       | 1.574        | 1.573        | 90           | 1                  |
| 6        | 0.776       | 1.036        | 0.954        | 101.997      | 1                  |
| 7        | 0.315       | 0.645        | 0.622        | 90           | 0.994              |
| 8        | 0.633       | 1.078        | 0.747        | 29.741       | 0.951              |
| 9        | 0.662       | 0.953        | 0.884        | 49.911       | 0.999              |
| 10       | 0.499       | 0.832        | 0.763        | 59.645       | 0.995              |
| 11       | 0.214       | 0.545        | 0.499        | 39.607       | 1                  |
| 12       | 0.087       | 0.346        | 0.319        | 48.592       | 1                  |
| 13       | 0.17        | 0.488        | 0.445        | 82.644       | 1                  |
| 14       | 0.457       | 0.791        | 0.735        | 86.383       | 1                  |
| 15       | 0.253       | 0.707        | 0.455        | 53.139       | 0.92               |
| 16       | 0.461       | 0.773        | 0.76         | 0            | 0.998              |
| 17       | 0.65        | 1.121        | 0.738        | 41.354       | 0.934              |
| 18       | 0.161       | 0.611        | 0.335        | 6.64         | 0.886              |
| 19       | 0.069       | 0.398        | 0.221        | 10.315       | 0.918              |
| 20       | 0.243       | 0.644        | 0.481        | 82.699       | 0.968              |
| 21       | 0.957       | 1.407        | 0.866        | 54.651       | 0.916              |
| 22       | 0.397       | 0.896        | 0.564        | 27.615       | 0.923              |
| 23       | 1.248       | 1.423        | 1.117        | 35.361       | 0.976              |
| 24       | 0.772       | 0.994        | 0.988        | 45           | 1                  |
| 25       | 0.193       | 0.499        | 0.493        | 31.751       | 0.978              |
| 26       | 0.716       | 1.11         | 0.822        | 41.566       | 0.972              |
| 27       | 0.135       | 0.484        | 0.355        | 22.305       | 0.954              |
| 28       | 0.173       | 0.542        | 0.406        | 45.002       | 0.965              |
| 29       | 0.073       | 0.353        | 0.263        | 35.872       | 0.973              |
| 30       | 0.393       | 0.817        | 0.613        | 171.684      | 0.981              |
| 31       | 0.419       | 0.734        | 0.727        | 134.835      | 0.996              |
| 32       | 0.726       | 0.965        | 0.958        | 100.575      | 0.996              |

|    |       |       |       |         |       |
|----|-------|-------|-------|---------|-------|
| 33 | 0.57  | 0.989 | 0.735 | 100.817 | 0.965 |
| 34 | 0.132 | 0.462 | 0.365 | 168.737 | 0.977 |
| 35 | 0.489 | 0.791 | 0.788 | 0       | 0.989 |
| 36 | 0.687 | 1.034 | 0.845 | 36.658  | 0.981 |
| 37 | 0.58  | 0.859 | 0.859 | 50.807  | 0.989 |
| 38 | 0.527 | 0.999 | 0.672 | 25.545  | 0.946 |
| 39 | 0.132 | 0.462 | 0.365 | 13.353  | 1     |
| 40 | 0.328 | 0.734 | 0.57  | 159.07  | 0.969 |
| 41 | 0.493 | 0.9   | 0.698 | 79.825  | 0.977 |
| 42 | 1.388 | 1.513 | 1.168 | 49.803  | 0.975 |
| 43 | 0.08  | 0.345 | 0.294 | 174.031 | 0.947 |
| 44 | 0.053 | 0.293 | 0.229 | 76.76   | 0.947 |
| 45 | 0.189 | 0.559 | 0.431 | 79.441  | 0.974 |
| 46 | 0.554 | 1.119 | 0.631 | 13.691  | 0.885 |
| 47 | 1.042 | 1.532 | 0.866 | 31.453  | 0.884 |
| 48 | 1.953 | 1.992 | 1.249 | 34.565  | 0.92  |
| 49 | 0.58  | 0.966 | 0.764 | 51.34   | 0.981 |
| 50 | 2.129 | 1.893 | 1.432 | 42.227  | 0.968 |
| 51 | 0.093 | 0.397 | 0.299 | 128.736 | 0.969 |
| 52 | 0.741 | 1.123 | 0.84  | 39.647  | 0.966 |
| 53 | 0.159 | 0.51  | 0.398 | 161.611 | 1     |
| 54 | 0.372 | 0.799 | 0.592 | 36.439  | 0.987 |
| 55 | 0.107 | 0.422 | 0.322 | 42.122  | 0.946 |
| 56 | 0.214 | 0.601 | 0.452 | 62.661  | 0.974 |
| 57 | 0.12  | 0.447 | 0.343 | 42.312  | 1     |
| 58 | 0.428 | 0.857 | 0.636 | 35.536  | 0.968 |
| 59 | 0.184 | 0.525 | 0.446 | 96.688  | 0.992 |
| 60 | 0.081 | 0.347 | 0.298 | 24.176  | 1     |
| 61 | 0.173 | 0.506 | 0.436 | 43.14   | 0.987 |
| 62 | 0.17  | 0.493 | 0.44  | 77.626  | 0.984 |
| 63 | 0.199 | 0.554 | 0.457 | 8.09    | 0.976 |
| 64 | 0.735 | 1.123 | 0.834 | 31.206  | 0.968 |
| 65 | 0.752 | 1.239 | 0.772 | 47.774  | 0.912 |
| 66 | 0.554 | 1.066 | 0.662 | 51.23   | 0.928 |
| 67 | 0.114 | 0.483 | 0.299 | 140.279 | 0.909 |
| 68 | 0.122 | 0.493 | 0.314 | 117.608 | 0.948 |
| 69 | 0.069 | 0.374 | 0.235 | 138.789 | 0.899 |



**Table S3.** Parameters calculated from image analysis on 4x400

| <b>n</b> | <b>Area</b> | <b>Major</b> | <b>Minor</b> | <b>Angle</b> | <b>Circularity</b> |
|----------|-------------|--------------|--------------|--------------|--------------------|
| 1        | 0.493       | 1.158        | 0.542        | 165.208      | 0.816              |
| 2        | 0.307       | 1.007        | 0.388        | 2.673        | 0.727              |
| 3        | 0.255       | 0.682        | 0.477        | 172.45       | 0.963              |
| 4        | 0.232       | 0.702        | 0.421        | 146.912      | 0.915              |
| 5        | 0.191       | 0.566        | 0.429        | 130.577      | 0.966              |
| 6        | 0.231       | 0.626        | 0.471        | 1.679        | 0.971              |
| 7        | 0.203       | 0.617        | 0.419        | 166.763      | 0.944              |
| 8        | 0.322       | 1.096        | 0.374        | 163.12       | 0.67               |
| 9        | 0.276       | 0.645        | 0.546        | 168.353      | 0.986              |
| 10       | 0.083       | 0.358        | 0.297        | 158.499      | 0.996              |
| 11       | 0.236       | 0.595        | 0.505        | 156.034      | 0.992              |
| 12       | 0.14        | 0.452        | 0.395        | 147.891      | 1                  |
| 13       | 0.112       | 0.406        | 0.35         | 145.551      | 1                  |
| 14       | 0.642       | 1.612        | 0.508        | 167.14       | 0.639              |
| 15       | 0.272       | 0.781        | 0.443        | 146.57       | 0.898              |
| 16       | 0.05        | 0.329        | 0.195        | 127.067      | 0.886              |
| 17       | 0.114       | 0.411        | 0.352        | 124.553      | 0.981              |
| 18       | 0.193       | 0.665        | 0.369        | 151.388      | 0.884              |
| 19       | 0.071       | 0.398        | 0.227        | 163.004      | 0.901              |
| 20       | 0.112       | 0.5          | 0.284        | 111.442      | 0.882              |
| 21       | 0.104       | 0.482        | 0.275        | 165.799      | 0.891              |
| 22       | 0.121       | 0.519        | 0.296        | 169.636      | 0.884              |
| 23       | 0.074       | 0.308        | 0.308        | 0            | 1                  |
| 24       | 0.593       | 1.386        | 0.545        | 171.817      | 0.737              |
| 25       | 0.323       | 1.019        | 0.403        | 174.819      | 0.747              |
| 26       | 0.224       | 0.691        | 0.413        | 167.173      | 0.908              |
| 27       | 0.118       | 0.503        | 0.298        | 160.295      | 0.896              |
| 28       | 0.067       | 0.377        | 0.228        | 61.264       | 0.896              |
| 29       | 0.058       | 0.349        | 0.213        | 165.269      | 0.93               |
| 30       | 0.072       | 0.39         | 0.235        | 146.239      | 0.903              |
| 31       | 0.081       | 0.41         | 0.253        | 167.847      | 0.921              |
| 32       | 0.116       | 0.497        | 0.296        | 3.005        | 0.917              |
| 33       | 0.649       | 1.315        | 0.628        | 171.095      | 0.823              |
| 34       | 0.38        | 1.007        | 0.48         | 168.168      | 0.824              |
| 35       | 0.138       | 0.608        | 0.289        | 163.914      | 0.814              |
| 36       | 0.226       | 0.776        | 0.371        | 151.943      | 0.813              |
| 37       | 0.162       | 0.659        | 0.313        | 162.417      | 0.818              |
| 38       | 0.107       | 0.529        | 0.257        | 146.416      | 0.819              |
| 39       | 0.467       | 1.539        | 0.386        | 172.494      | 0.539              |
| 40       | 0.472       | 1.228        | 0.489        | 164.999      | 0.743              |
| 41       | 0.1         | 0.564        | 0.225        | 155.813      | 0.749              |
| 42       | 0.268       | 0.799        | 0.428        | 162.281      | 0.869              |
| 43       | 0.076       | 0.334        | 0.291        | 149.43       | 0.969              |

|    |       |       |       |         |       |
|----|-------|-------|-------|---------|-------|
| 44 | 0.077 | 0.335 | 0.292 | 158.52  | 1     |
| 45 | 0.123 | 0.439 | 0.356 | 164.825 | 0.975 |
| 46 | 0.256 | 0.644 | 0.507 | 149.881 | 0.982 |
| 47 | 0.795 | 1.413 | 0.717 | 169.06  | 0.846 |
| 48 | 0.771 | 1.1   | 0.892 | 141.519 | 0.983 |
| 49 | 0.087 | 0.409 | 0.271 | 157.88  | 0.937 |
| 50 | 0.224 | 0.658 | 0.434 | 155.847 | 0.935 |
| 51 | 0.395 | 0.885 | 0.568 | 153.299 | 0.929 |
| 52 | 0.597 | 1.446 | 0.526 | 153.519 | 0.695 |
| 53 | 0.681 | 1.54  | 0.563 | 166.787 | 0.702 |
| 54 | 0.534 | 1.245 | 0.547 | 170.9   | 0.78  |
| 55 | 0.201 | 0.763 | 0.335 | 159.356 | 0.78  |
| 56 | 0.098 | 0.527 | 0.236 | 157.517 | 0.782 |
| 57 | 0.282 | 0.899 | 0.4   | 145.038 | 0.79  |
| 58 | 0.06  | 0.408 | 0.187 | 142.965 | 0.784 |
| 59 | 0.067 | 0.394 | 0.218 | 127.278 | 0.867 |
| 60 | 0.024 | 0.235 | 0.131 | 127.027 | 0.841 |
| 61 | 0.045 | 0.239 | 0.239 | 0       | 1     |
| 62 | 0.035 | 0.21  | 0.21  | 0       | 0.897 |
| 63 | 0.167 | 0.571 | 0.372 | 145.992 | 0.943 |
| 64 | 0.168 | 0.568 | 0.377 | 164.754 | 0.904 |
| 65 | 1.109 | 2.104 | 0.671 | 168.208 | 0.643 |
| 66 | 0.076 | 0.358 | 0.27  | 122.114 | 0.982 |
| 67 | 0.124 | 0.459 | 0.343 | 152.575 | 0.987 |
| 68 | 0.351 | 0.897 | 0.499 | 167.076 | 0.882 |
| 69 | 0.576 | 1.516 | 0.484 | 171.387 | 0.642 |
| 70 | 0.041 | 0.297 | 0.175 | 166.5   | 0.894 |
| 71 | 0.528 | 1.236 | 0.544 | 168.495 | 0.788 |
| 72 | 0.069 | 0.296 | 0.296 | 0       | 1     |
| 73 | 0.346 | 1.208 | 0.365 | 174.691 | 0.613 |
| 74 | 0.617 | 1.624 | 0.484 | 172.792 | 0.611 |
| 75 | 0.293 | 1.009 | 0.369 | 159.05  | 0.707 |
| 76 | 0.088 | 0.446 | 0.253 | 163.171 | 0.885 |
| 77 | 0.179 | 0.749 | 0.304 | 162.501 | 0.746 |
| 78 | 0.219 | 0.746 | 0.374 | 152.286 | 0.833 |
| 79 | 0.135 | 0.435 | 0.396 | 112.168 | 1     |
| 80 | 0.098 | 0.414 | 0.3   | 167.12  | 0.97  |
| 81 | 0.072 | 0.382 | 0.24  | 9.917   | 0.914 |
| 82 | 0.144 | 0.545 | 0.336 | 152.316 | 0.9   |
| 83 | 0.157 | 0.52  | 0.384 | 158.949 | 0.956 |
| 84 | 0.064 | 0.305 | 0.269 | 119.636 | 0.989 |
| 85 | 0.061 | 0.299 | 0.261 | 125.768 | 0.963 |
| 86 | 0.076 | 0.334 | 0.291 | 120.57  | 0.966 |
| 87 | 0.053 | 0.276 | 0.245 | 115.285 | 1     |
| 88 | 0.058 | 0.289 | 0.257 | 136.802 | 1     |
| 89 | 0.076 | 0.331 | 0.294 | 136.916 | 0.983 |

|    |       |       |       |         |       |
|----|-------|-------|-------|---------|-------|
| 90 | 0.055 | 0.293 | 0.241 | 134.997 | 1     |
| 91 | 0.044 | 0.264 | 0.211 | 134.998 | 1     |
| 92 | 0.159 | 0.527 | 0.385 | 167.067 | 0.967 |
